# Supplementary material for: Small chemical causes drastic structural effects: the case of calcium glutarate
Source: Royal Society of Chemistry journal article supplement (doi:10.1039/c0ce00450b), 2010-12-15
Supplement: c0ce00450b.pdf [file c0ce00450b.pdf]

**Supporting information : Small chemical causes, drastic structural effects : the case of calcium glutarate**

**Table 1: Fractional atomic coordinates for BioMIL-2**

|    | <i>x</i>     | <i>y</i>    | <i>z</i>    | $U_{iso}^*/U_{eq}$ |
|----|--------------|-------------|-------------|--------------------|
| Ca | -0.1171 (3)  | 0.20243 (8) | 0.4140 (4)  | 0.0060 (4)         |
| O1 | -0.1536 (8)  | 0.1648 (3)  | 0.8015 (7)  | 0.0120 (4)         |
| O2 | 0.2783 (6)   | -0.1811 (3) | 0.9551 (9)  | 0.0120 (4)         |
| O3 | -0.0395 (5)  | -0.1847 (3) | 0.8915 (14) | 0.0120 (4)         |
| O4 | -0.0329 (6)  | 0.2753 (3)  | 0.0998 (10) | 0.0120 (4)         |
| O5 | -0.1182 (8)  | 0.1077 (3)  | 0.1273 (8)  | 0.0120 (4)         |
| C1 | 0.1195 (14)  | -0.1480 (4) | 0.8966 (17) | 0.0167 (4)         |
| C2 | 0.1250 (15)  | -0.0699 (4) | 0.7807 (14) | 0.0167 (4)         |
| C3 | -0.0005 (12) | -0.0249 (4) | 0.9239 (13) | 0.0167 (4)         |
| C4 | 0.0042 (14)  | 0.0443 (4)  | 0.7932 (12) | 0.0167 (4)         |
| C5 | -0.0940 (13) | 0.1098 (4)  | 0.9170 (15) | 0.0167 (4)         |

**Table 2: Fractional atomic coordinates for bioMIL-2ht**

|    | <i>x</i>   | <i>y</i>    | <i>z</i>   | $U_{iso}^*/U_{eq}$ |
|----|------------|-------------|------------|--------------------|
| Ca | 0.6063(2)  | 0.01536(3)  | 1.00168(5) | 0.0157(4)          |
| O1 | 0.61447(5) | -0.03613(5) | 0.75749(2) | 0.0217(3)          |
| O2 | 0.53125(2) | 0.06483(6)  | 0.91358(5) | 0.0308(5)          |
| O3 | 0.69664(7) | 0.11466(1)  | 0.86398(3) | 0.0261(5)          |
| O4 | 0.63936(2) | 0.08696(4)  | 1.22311(1) | 0.0352(3)          |
| C1 | 0.51444(3) | 0.09672(4)  | 0.80966(2) | 0.0204(6)          |
| C3 | 0.57472(4) | -0.09979(2) | 0.69476(5) | 0.0181(3)          |
| C4 | 0.52104(1) | -0.16407(6) | 0.79481(5) | 0.0303(7)          |
| C5 | 0.5702(1)  | 0.14771(3)  | 0.6919(2)  | 0.0224(5)          |
| C6 | 0.56857(4) | -0.18454(6) | 0.9052(4)  | 0.0288(8)          |

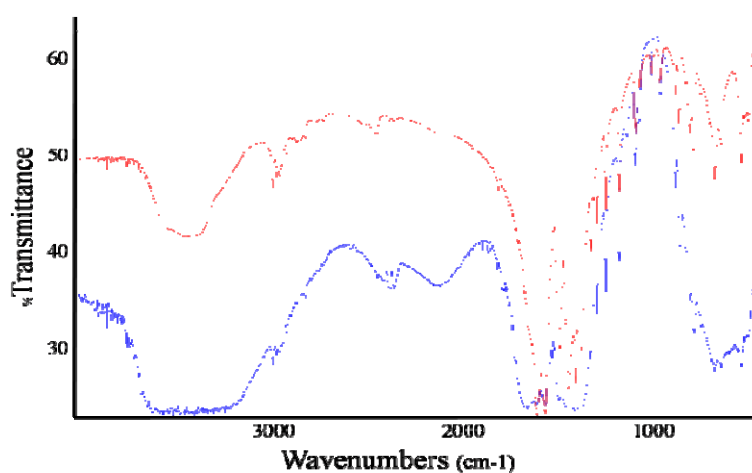

**Figure 1: IR spectra for BioMIL-2 (blue) and BioMIL-2ht (red)**
